# Supplementary material for: Cx<sub>4</sub>Mab-1: a Novel Anti-mouse CXCR4 Monoclonal Antibody for Flow Cytometry
Source: Preprints.org preprint supplement (doi:10.20944/preprints202311.0501.v1), 2023-11-08
Supplement: Supplementary file 1 [file supplementary]

## Supplementary Figure 1

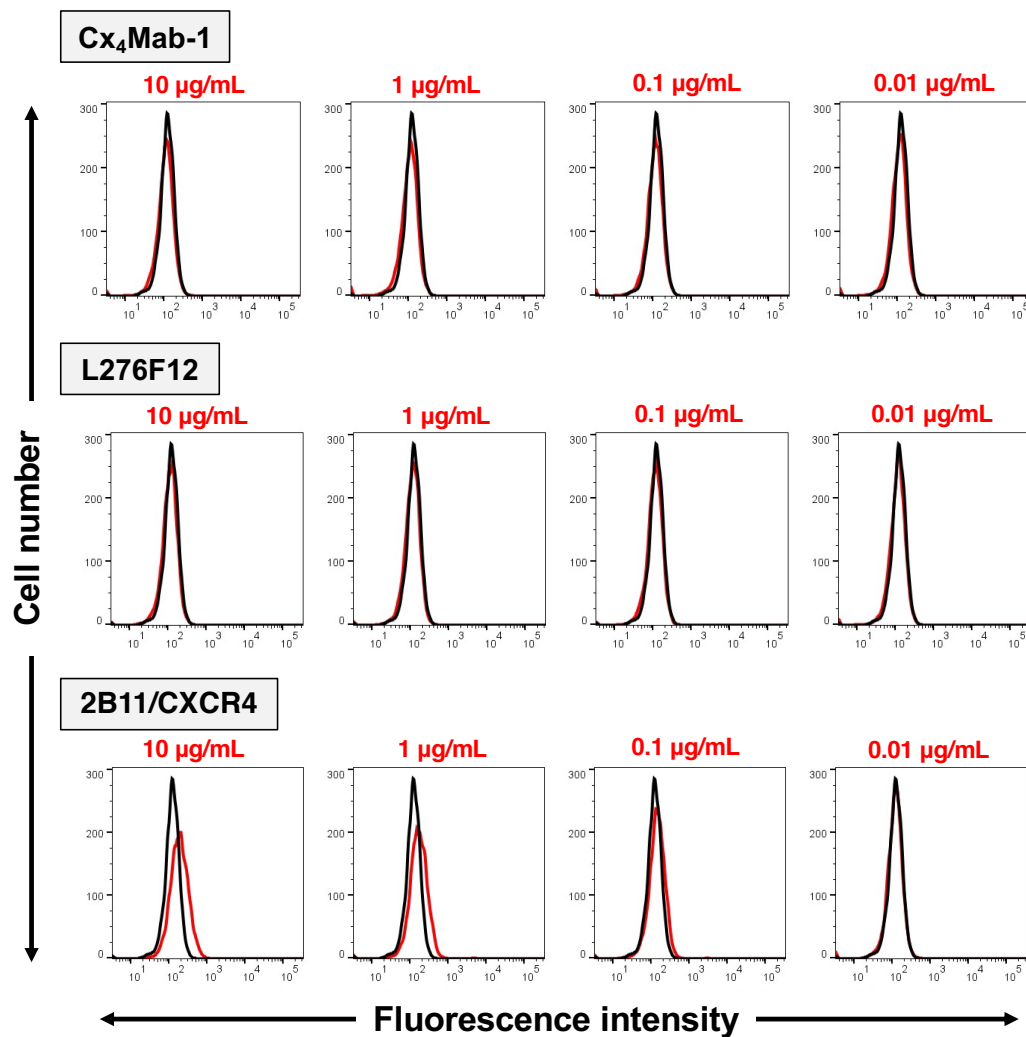

**Supplementary Figure 1. Flow cytometry of CHO-K1 cells using anti-mCXCR4 mAbs.** CHO-K1 cells were treated with 0.01–10 µg/mL of Cx<sub>4</sub>Mab-1, L276F12, or 2B11/CXCR4 followed by treatment with Alexa Fluor 488-conjugated anti-rat IgG. The red lines show the cells treated with each mAb. The black line shows the cells treated with blocking buffer and Alexa Fluor 488-conjugated anti-rat IgG (negative control).
